# Supplementary material
Source: HighWire-hosted journal article supplement (https://cmajopen-stage.highwire.org/highwire/filestream/88574/field_highwire_adjunct_files/0/open-2021-0313-1-at.pdf)

## SUPPLEMENTARY INFORMATION

### ***Brief CLSA Methodology***

The Canadian Longitudinal Study on Aging (CLSA) is a nationally generalizable sample of Canadian adults aged 45-85 at the time of recruitment from the 10 provinces across Canada. The CLSA has a sample of 51,338 participants that will be followed for at least 20 years. The sampling frame for the CLSA was based off the Canadian Community Health Survey (CCHS) 4.2 on Healthy Aging implemented by Statistics Canada, with supplementation from provincial healthcare registration databases and random digit dialing to ensure the target sample size was met. Further details on the CCHS 4.2 Health Aging study design can be found elsewhere (1,2). The CLSA inclusion criteria were: able to complete interviews in either English or French, cognitively able to participate on their own, not institutionalized, did not reside in a Canadian territory or on a Federal First Nations reserve, or not full-time members of the Canadian Armed forces. At baseline recruitment, trained interviewers made the decision if someone was unable to provide informed consent on their own or unable to provide reliable information, and thus were excluded from the study.

Participants were recruited into two cohorts within the CLSA, the tracking cohort (n baseline = 21,241) and the comprehensive cohort (n baseline = 30,097). Data on the comprehensive cohort was collected using computer-assisted personal interviews completed in the participants' home and computer-assisted telephone interviews completed over the phone. In addition, participants in the comprehensive cohort also completed face-to-face interviews and visits to local data collection sites (DCS) where more in-depth information was collected. Data collection has taken place at baseline (2011-2015) (n=51,338) and follow-up 1 (2015-2018) (n=44,817).

In April 2020, the CLSA COVID-19 Questionnaire Study was launched to collect pandemic-related data. The CLSA COVID-19 surveys were developed by CLSA COVID-19 Team. The survey included

several questions and validated measurement tools (e.g., CES-D-10), and items that were included in the CLSA baseline and follow-up surveys to allow for longitudinal assessment of participants over time. Of the 51,338 participants within the CLSA, 42,700 participants were invited to participate in the COVID survey. Participants were ineligible to be included if they had withdrawn from the CLSA, required a proxy, for administrative reasons (e.g., current contact information unavailable) or if they had died. Participants were contacted via email (n=34,498) or telephone for those without internet access (n=8,202) by CLSA staff or a private marketing company. Participants were provided with information about the purpose and scope of the study prior to agreeing to participate. Among the 42,700 participants invited to participate, 28,559 (66.9%) agreed to participate in the CLSA COVID-19 study. The CLSA COVID-19 Study collected longitudinal data over a 9-month period with participants. A baseline survey was administered from April 2020-June 2020 and the Exit Survey administered from September 2020-December 2020, which collected information on COVID-19 symptoms, risk factors, healthcare use, health behaviours, psychosocial and economic consequences of the pandemic. There were additional, weekly, bi-weekly, and monthly surveys that were shortened and focused in on COVID-19 symptoms and status and behaviours. Participants either completed surveys via web (n= 23,832) or by telephone interview (n= 4,727).

All surveys used for the CLSA can be found at the following link: <https://www.clsa-elcv.ca/researchers/data-collection>

#### References:

1. Raina P, Wolfson C, Kirkland S. CANADIAN LONGITUDINAL STUDY ON AGING (CLSA) PROTOCOL. Available from: <https://clsa-elcv.ca/doc/511>

2. Raina P, Wolfson C, Kirkland S, Griffith LE, Balion C, Cossette B, et al. Cohort Profile: The Canadian Longitudinal Study on Aging (CLSA). *International Journal of Epidemiology*. 2019 Dec 1;48(6):1752–1753j.

**Table A1.** The proportion of Canadian adults reporting stressors by socioeconomic characteristics within the Canadian Longitudinal Study on Aging (CLSA) at CLSA COVID-19 Questionnaire Exit Survey (September-December 2020)

|                                                 | Stressors N (row %) |                                      |                                   |                |                                             |                             |                                      |                    |                        |                      |                                                 |                                   |
|-------------------------------------------------|---------------------|--------------------------------------|-----------------------------------|----------------|---------------------------------------------|-----------------------------|--------------------------------------|--------------------|------------------------|----------------------|-------------------------------------------------|-----------------------------------|
|                                                 | Participant was ill | Someone close to participant was ill | Someone close to participant died | Loss of income | Unable to access necessary food or supplies | Unable to access healthcare | Unable to access usual prescriptions | Increased conflict | Separation from family | Increased caregiving | Unable to care for those who require assistance | Breakdown in family relationships |
| Sex                                             |                     |                                      |                                   |                |                                             |                             |                                      |                    |                        |                      |                                                 |                                   |
| Male                                            | 1182 (11%)          | 1489 (13%)                           | 1552 (14%)                        | 1432 (11%)     | 558 (5%)                                    | 2457 (22%)                  | 498 (4%)                             | 612 (6%)           | 4832 (43%)             | 909 (8%)             | 827 (7%)                                        | 438 (4%)                          |
| Female                                          | 1704 (14%)          | 1939 (15%)                           | 2104 (17%)                        | 1402 (13%)     | 724 (6%)                                    | 2939 (23%)                  | 638 (5%)                             | 767 (6%)           | 7175 (57%)             | 1436 (11%)           | 1257 (10%)                                      | 644 (5%)                          |
| Age group                                       |                     |                                      |                                   |                |                                             |                             |                                      |                    |                        |                      |                                                 |                                   |
| 50-64 years                                     | 1099 (13%)          | 1388 (17%)                           | 1226 (15%)                        | 1736 (21%)     | 637(8%)                                     | 2085 (25%)                  | 472 (6%)                             | 641 (8%)           | 4342(53%)              | 1156 (14%)           | 957 (12%)                                       | 517 (6%)                          |
| 65-74 years                                     | 1093 (13%)          | 1190 (14%)                           | 1286 (15%)                        | 822 (9%)       | 435 (5%)                                    | 2101 (24%)                  | 414 (5%)                             | 446 (5%)           | 4607 (53%)             | 776 (9%)             | 749 (9%)                                        | 356 (4%)                          |
| 75-96 years                                     | 694 (10%)           | 850 (13%)                            | 1144 (17%)                        | 276 (4%)       | 210 (3%)                                    | 1210 (18%)                  | 250 (4%)                             | 292 (4%)           | 3058 (45%)             | 413 (6%)             | 378 (6%)                                        | 209 (3%)                          |
| Racial background                               |                     |                                      |                                   |                |                                             |                             |                                      |                    |                        |                      |                                                 |                                   |
| White                                           | 2814 (12%)          | 3332 (14%)                           | 3515 (15%)                        | 2719 (12%)     | 1239 (5%)                                   | 5255 (23%)                  | 1106 (5%)                            | 1340 (6%)          | 11711 (51%)            | 2277 (10%)           | 2015 (9%)                                       | 1049 (5%)                         |
| Non-white                                       | 69 (10%)            | 91 (14%)                             | 135 (20%)                         | 112 (17%)      | 43 (6%)                                     | 138 (21%)                   | 29 (4%)                              | 38 (6%)            | 281 (42%)              | 63 (9%)              | 67 (10%)                                        | 32 (5%)                           |
| Education                                       |                     |                                      |                                   |                |                                             |                             |                                      |                    |                        |                      |                                                 |                                   |
| Secondary school graduation or less             | 369 (11%)           | 421 (12%)                            | 537 (16%)                         | 314 (9%)       | 156 (5%)                                    | 661 (19%)                   | 150 (4%)                             | 181 (5%)           | 1447 (42%)             | 267 (8%)             | 204 (6%)                                        | 142 (4%)                          |
| Some post-secondary education                   | 219 (13%)           | 259 (15%)                            | 283 (17%)                         | 197 (12%)      | 111 (7%)                                    | 409 (24%)                   | 101 (6%)                             | 98 (6%)            | 880 (52%)              | 157 (9%)             | 155 (9%)                                        | 82 (5%)                           |
| Post-secondary degree or diploma                | 2293 (12%)          | 2740 (15%)                           | 2827 (15%)                        | 2317 (12%)     | 1014 (5%)                                   | 4317 (23%)                  | 882 (5%)                             | 1096 (6%)          | 9660 (52%)             | 1917 (10%)           | 1723 (9%)                                       | 854 (5%)                          |
| Household income                                |                     |                                      |                                   |                |                                             |                             |                                      |                    |                        |                      |                                                 |                                   |
| Less than \$50,000                              | 768 (14%)           | 763 (14%)                            | 965 (17%)                         | 591 (10%)      | 319 (6%)                                    | 1208 (21%)                  | 273 (5%)                             | 313 (6%)           | 2570 (45%)             | 380 (7%)             | 438 (8%)                                        | 274 (5%)                          |
| \$50,000 to less than \$100,000                 | 993 (12%)           | 1215 (14%)                           | 1290 (15%)                        | 905 (11%)      | 409 (5%)                                    | 1932 (23%)                  | 373 (4%)                             | 468 (6%)           | 4351 (51%)             | 832 (10%)            | 692 (8%)                                        | 364 (4%)                          |
| \$100,000 to less than \$150,000                | 512 (11%)           | 671 (15%)                            | 690 (15%)                         | 630 (14%)      | 242 (5%)                                    | 1088 (24%)                  | 233 (5%)                             | 291 (6%)           | 2404 (53%)             | 501 (11%)            | 445 (10%)                                       | 203 (5%)                          |
| \$150,000 or more                               | 454 (12%)           | 590 (16%)                            | 478 (13%)                         | 556 (15%)      | 239 (6%)                                    | 892 (24%)                   | 187 (5%)                             | 221 (6%)           | 2031 (55%)             | 501 (14%)            | 399 (11%)                                       | 178 (5%)                          |
| Region                                          |                     |                                      |                                   |                |                                             |                             |                                      |                    |                        |                      |                                                 |                                   |
| Atlantic                                        | 500 (12%)           | 530 (12%)                            | 743 (17%)                         | 424 (10%)      | 212 (5%)                                    | 1081 (25%)                  | 212 (5%)                             | 180 (4%)           | 2007 (47%)             | 422 (10%)            | 322 (8%)                                        | 131 (3%)                          |
| Quebec                                          | 527 (12%)           | 797 (19%)                            | 627 (15%)                         | 431 (10%)      | 109 (3%)                                    | 589 (14%)                   | 81 (2%)                              | 244 (6%)           | 1643 (38%)             | 232 (5%)             | 283 (7%)                                        | 281 (7%)                          |
| Ontario                                         | 670 (12%)           | 742 (13%)                            | 868 (16%)                         | 655 (12%)      | 342 (6%)                                    | 1628 (30%)                  | 322 (6%)                             | 338 (6%)           | 3139 (57%)             | 629 (11%)            | 553 (10%)                                       | 235 (4%)                          |
| Prairies                                        | 584 (12%)           | 737 (14%)                            | 762 (15%)                         | 709 (14%)      | 301 (7%)                                    | 898 (18%)                   | 285 (6%)                             | 317 (6%)           | 2826 (56%)             | 545 (11%)            | 490 (10%)                                       | 228 (5%)                          |
| British Columbia                                | 604 (13%)           | 622 (14%)                            | 656 (14%)                         | 615 (13%)      | 318 (7%)                                    | 1200 (26%)                  | 236 (5%)                             | 300 (7%)           | 2392 (52%)             | 517 (11%)            | 436 (10%)                                       | 207 (5%)                          |
| Marital Status                                  |                     |                                      |                                   |                |                                             |                             |                                      |                    |                        |                      |                                                 |                                   |
| Single (never married/never lived with partner) | 284 (14%)           | 285 (14%)                            | 303 (15%)                         | 295 (15%)      | 115 (6%)                                    | 465 (23%)                   | 113 (6%)                             | 114 (6%)           | 876 (44%)              | 157 (8%)             | 158 (8%)                                        | 106 (5%)                          |
| Married or common law relationship              | 1932 (12%)          | 2523 (15%)                           | 2503 (15%)                        | 2009 (12%)     | 884 (5%)                                    | 3837 (23%)                  | 781 (5%)                             | 1016 (6%)          | 8507 (51%)             | 1843 (11%)           | 1547 (9%)                                       | 747 (5%)                          |
| Widowed                                         | 272 (12%)           | 265 (11%)                            | 402 (17%)                         | 127 (6%)       | 85 (4%)                                     | 428 (19%)                   | 91 (4%)                              | 84 (4%)            | 1141 (50%)             | 121 (5%)             | 144 (6%)                                        | 78 (3%)                           |
| Divorced and separated                          | 395 (14%)           | 354 (13%)                            | 448 (16%)                         | 400 (15%)      | 198 (7%)                                    | 660 (24%)                   | 151 (5%)                             | 164 (6%)           | 1476 (54%)             | 224 (8%)             | 234 (9%)                                        | 149 (5%)                          |
| Essential worker status                         |                     |                                      |                                   |                |                                             |                             |                                      |                    |                        |                      |                                                 |                                   |
| Doesn't work outside the home                   | 2077 (12%)          | 2394 (14%)                           | 2717 (16%)                        | 1213 (7%)      | 857 (5%)                                    | 3863 (22%)                  | 797 (5%)                             | 896 (5%)           | 8705 (51%)             | 1519 (9%)            | 8705 (51%)                                      | 694 (4%)                          |
| Essential worker                                | 308 (12%)           | 418 (17%)                            | 371 (15%)                         | 430 (17%)      | 187 (8%)                                    | 595 (24%)                   | 143 (6%)                             | 193 (8%)           | 1220 (49%)             | 317 (13%)            | 1220 (49%)                                      | 164 (7%)                          |
| Not essential worker                            | 404 (12%)           | 511 (15%)                            | 465 (14%)                         | 1059 (31%)     | 191 (6%)                                    | 780 (23%)                   | 160 (5%)                             | 240 (7%)           | 1774 (52%)             | 442 (13%)            | 1774 (52%)                                      | 190 (6%)                          |
| Urban/rural status                              |                     |                                      |                                   |                |                                             |                             |                                      |                    |                        |                      |                                                 |                                   |
| Urban                                           | 2352 (12%)          | 2832 (15%)                           | 2966 (15%)                        | 2321 (12%)     | 1056 (5%)                                   | 4398 (23%)                  | 925 (5%)                             | 1134 (6%)          | 9925 (51%)             | 1920 (10%)           | 1700 (9%)                                       | 884 (5%)                          |
| Rural                                           | 517 (12%)           | 575 (14%)                            | 671 (16%)                         | 497 (12%)      | 215 (5%)                                    | 966 (23%)                   | 202 (5%)                             | 236 (6%)           | 1358 (48%)             | 413 (10%)            | 374 (9%)                                        | 193 (5%)                          |
| Overall                                         | 2886 (12%)          | 3428 (14%)                           | 3656 (15%)                        | 2834 (5%)      | 1282 (5%)                                   | 5396 (23%)                  | 1136 (5%)                            | 1379 (6%)          | 12007 (50%)            | 2345 (10%)           | 2084 (9%)                                       | 1082 (5%)                         |

**Table A2.** Self-reported perception of the consequences of the COVID-19 pandemic by socioeconomic characteristics among Canadian adults within the Canadian Longitudinal Study on Aging (CLSA) at CLSA COVID-19 Questionnaire Exit Survey (September-December 2020)

|                                                 | Consequences of the COVID-19 pandemic on the study participant and their household |                                |                                               |
|-------------------------------------------------|------------------------------------------------------------------------------------|--------------------------------|-----------------------------------------------|
|                                                 | Negative/very negative<br>n=14520<br>N (row %)                                     | Neutral<br>n=6962<br>N (row %) | Positive/very positive<br>n=1538<br>N (row %) |
| Sex                                             |                                                                                    |                                |                                               |
| Male                                            | 6937 (63%)                                                                         | 3383 (31%)                     | 615 (6%)                                      |
| Female                                          | 7583 (63%)                                                                         | 3579 (30%)                     | 923 (8%)                                      |
| Age group                                       |                                                                                    |                                |                                               |
| 50-64 years                                     | 5183 (64%)                                                                         | 2243 (28%)                     | 616 (8%)                                      |
| 65-74 years                                     | 5378 (64%)                                                                         | 2560 (30%)                     | 507 (6%)                                      |
| 75-96 years                                     | 3959 (61%)                                                                         | 2159 (33%)                     | 415 (6%)                                      |
| Racial background                               |                                                                                    |                                |                                               |
| White                                           | 14130 (63%)                                                                        | 6768 (30%)                     | 1465 (7%)                                     |
| Non-white                                       | 374 (59%)                                                                          | 186 (29%)                      | 72 (11%)                                      |
| Education                                       |                                                                                    |                                |                                               |
| Secondary school graduation or less             | 1801 (55%)                                                                         | 1218 (38%)                     | 229 (7%)                                      |
| Some post-secondary education                   | 1046 (63%)                                                                         | 508 (31%)                      | 97 (6%)                                       |
| Post-secondary degree or diploma                | 11643 (64%)                                                                        | 5223 (29%)                     | 1211 (7%)                                     |
| Household income                                |                                                                                    |                                |                                               |
| Less than \$50,000                              | 3153 (58%)                                                                         | 1855 (34%)                     | 399 (7%)                                      |
| \$50,000 to less than \$100,000                 | 5203 (63%)                                                                         | 2529 (31%)                     | 499 (6%)                                      |
| \$100,000 to less than \$150,000                | 2939 (66%)                                                                         | 1262 (28%)                     | 261 (6%)                                      |
| \$150,000 or more                               | 2455 (67%)                                                                         | 927 (25%)                      | 281 (8%)                                      |
| Region                                          |                                                                                    |                                |                                               |
| Atlantic                                        | 2350 (57%)                                                                         | 1494 (36%)                     | 315 (8%)                                      |
| Quebec                                          | 2040 (50%)                                                                         | 1717 (42%)                     | 346 (8%)                                      |
| Ontario                                         | 3704 (69%)                                                                         | 1349 (25%)                     | 312 (6%)                                      |
| Prairies                                        | 3410 (70%)                                                                         | 1215 (25%)                     | 283 (6%)                                      |
| British Columbia                                | 3016 (67%)                                                                         | 1187 (26%)                     | 282 (6%)                                      |
| Marital Status                                  |                                                                                    |                                |                                               |
| Single (never married/never lived with partner) | 1152 (60%)                                                                         | 626 (33%)                      | 130 (7%)                                      |
| Married or common law relationship              | 10335 (64%)                                                                        | 4819 (30%)                     | 1100 (7%)                                     |
| Widowed                                         | 1363 (62%)                                                                         | 699 (32%)                      | 128 (6%)                                      |
| Divorced and separated                          | 1663 (63%)                                                                         | 814 (31%)                      | 177 (7%)                                      |
| Essential worker status                         |                                                                                    |                                |                                               |
| Doesn't work outside the home                   | 10555 (63%)                                                                        | 5120 (31%)                     | 998 (6%)                                      |
| Essential worker                                | 1468 (61%)                                                                         | 748 (31%)                      | 197 (8%)                                      |
| Not essential worker                            | 2114 (64%)                                                                         | 911 (28%)                      | 288 (9%)                                      |
| Urban/rural status                              |                                                                                    |                                |                                               |

|       |             |            |           |
|-------|-------------|------------|-----------|
| Urban | 12105 (64%) | 5507 (30%) | 1214 (6%) |
| Rural | 2331 (57%)  | 1424 (35%) | 317 (8%)  |

**Table A3.** The unadjusted association between socioeconomic characteristics and individual stressors among Canadian adults in the Canadian Longitudinal Study on Aging at CLSA COVID-19 Questionnaire Exit Survey (September-December 2020)

|                                           | Stressors<br>Unadjusted PR (95% CI) |                                      |                                   |                   |                                             |                             |                                      |                    |                        |                      |                                                 |                                   |
|-------------------------------------------|-------------------------------------|--------------------------------------|-----------------------------------|-------------------|---------------------------------------------|-----------------------------|--------------------------------------|--------------------|------------------------|----------------------|-------------------------------------------------|-----------------------------------|
|                                           | Participant was ill                 | Someone close to participant was ill | Someone close to participant died | Loss of income    | Unable to access necessary food or supplies | Unable to access healthcare | Unable to access usual prescriptions | Increased conflict | Separation from family | Increased caregiving | Unable to care for those who require assistance | Breakdown in family relationships |
| Sex                                       |                                     |                                      |                                   |                   |                                             |                             |                                      |                    |                        |                      |                                                 |                                   |
| Male                                      | 1.00                                | 1.00                                 | 1.00                              | 1.00              | 1.00                                        | 1.00                        | 1.00                                 | 1.00               | 1.00                   | 1.00                 | 1.00                                            | 1.00                              |
| Female                                    | 1.27 (1.19, 1.37)                   | 1.15 (1.08, 1.22)                    | 1.20 (1.13, 1.27)                 | 0.90 (0.84, 0.97) | 1.14 (1.02, 1.27)                           | 1.05 (1.01, 1.11)           | 1.13 (1.01, 1.27)                    | 1.11 (1.00, 1.23)  | 1.31 (1.28, 1.34)      | 1.39 (1.29, 1.51)    | 1.34 (1.23, 1.46)                               | 1.30 (1.15, 1.46)                 |
| Age group                                 |                                     |                                      |                                   |                   |                                             |                             |                                      |                    |                        |                      |                                                 |                                   |
| 50-64 years                               | 1.00                                | 1.00                                 | 1.00                              | 1.00              | 1.00                                        | 1.00                        | 1.00                                 | 1.00               | 1.00                   | 1.00                 | 1.00                                            | 1.00                              |
| 65-74 years                               | 0.94 (0.87, 1.02)                   | 0.81 (0.76, 0.87)                    | 1.00 (0.93, 1.07)                 | 0.45 (0.42, 0.49) | 0.65 (0.58, 0.73)                           | 0.96 (0.91, 1.01)           | 0.83 (0.73, 0.95)                    | 0.66 (0.59, 0.74)  | 1.01 (0.98, 1.04)      | 0.64 (0.59, 0.69)    | 0.74 (0.68, 0.81)                               | 0.65 (0.57, 0.75)                 |
| 75-96 years                               | 0.77 (0.70, 0.84)                   | 0.74 (0.69, 0.80)                    | 1.13 (1.05, 1.22)                 | 0.19 (0.17, 0.22) | 0.40 (0.34, 0.47)                           | 0.70 (0.66, 0.75)           | 0.64 (0.55, 0.75)                    | 0.56 (0.48, 0.63)  | 0.86 (0.83, 0.88)      | 0.43 (0.39, 0.48)    | 0.48 (0.43, 0.54)                               | 0.49 (0.42, 0.57)                 |
| Racial background                         |                                     |                                      |                                   |                   |                                             |                             |                                      |                    |                        |                      |                                                 |                                   |
| White                                     | 1.00                                | 1.00                                 | 1.00                              | 1.00              | 1.00                                        | 1.00                        | 1.00                                 | 1.00               | 1.00                   | 1.00                 | 1.00                                            | 1.00                              |
| Non-white                                 | 0.85 (0.67, 1.05)                   | 0.95 (0.77, 1.14)                    | 1.33 (1.13, 1.54)                 | 1.42 (1.19, 1.68) | 1.20 (0.88, 1.59)                           | 0.91 (0.77, 1.05)           | 0.91 (0.62, 1.28)                    | 0.99 (0.72, 1.33)  | 0.83 (0.76, 0.91)      | 0.96 (0.75, 1.20)    | 1.15 (0.90, 1.44)                               | 1.06 (0.73, 1.46)                 |
| Education                                 |                                     |                                      |                                   |                   |                                             |                             |                                      |                    |                        |                      |                                                 |                                   |
| Secondary school graduation or less       | 0.87 (0.79, 0.97)                   | 0.83 (0.76, 0.92)                    | 1.03 (0.95, 1.12)                 | 0.74 (0.66, 0.82) | 0.84 (0.71, 0.98)                           | 0.83 (0.77, 0.89)           | 0.92 (0.78, 1.10)                    | 0.90 (0.77, 1.04)  | 0.81 (0.78, 0.85)      | 0.76 (0.67, 0.85)    | 0.64 (0.56, 0.74)                               | 0.90 (0.76, 1.07)                 |
| Some post-secondary education             | 1.04 (0.91, 1.18)                   | 1.03 (0.92, 1.16)                    | 1.09 (0.97, 1.22)                 | 0.93 (0.81, 1.06) | 1.19 (0.98, 1.44)                           | 1.03 (0.95, 1.13)           | 1.25 (1.02, 1.52)                    | 0.98 (0.79, 1.19)  | 0.99 (0.95, 1.04)      | 0.89 (0.76, 1.04)    | 0.98 (0.84, 1.14)                               | 1.05 (0.83, 1.30)                 |
| Post-secondary degree or diploma          | 1.00                                | 1.00                                 | 1.00                              | 1.00              | 1.00                                        | 1.00                        | 1.00                                 | 1.00               | 1.00                   | 1.00                 | 1.00                                            | 1.00                              |
| Household income                          |                                     |                                      |                                   |                   |                                             |                             |                                      |                    |                        |                      |                                                 |                                   |
| Less than \$50,000                        | 1.21 (1.09, 1.34)                   | 0.92 (0.83, 1.01)                    | 1.13 (1.03, 1.23)                 | 0.75 (0.68, 0.84) | 1.06 (0.90, 1.25)                           | 0.89 (0.83, 0.96)           | 0.94 (0.80, 1.12)                    | 0.87 (0.74, 1.01)  | 0.86 (0.83, 0.90)      | 0.61 (0.54, 0.69)    | 0.79 (0.70, 0.90)                               | 1.09 (0.91, 1.30)                 |
| \$50,000 to less than \$100,000           | 1.04 (0.94, 1.15)                   | 0.97 (0.89, 1.06)                    | 1.00 (0.92, 1.09)                 | 0.75 (0.70, 0.85) | 0.90 (0.78, 1.06)                           | 0.95 (0.89, 1.01)           | 0.86 (0.73, 1.01)                    | 0.86 (0.75, 0.99)  | 0.97 (0.94, 1.00)      | 0.89 (0.81, 0.99)    | 0.83 (0.74, 0.93)                               | 0.96 (0.81, 1.14)                 |
| \$100,000 to less than \$150,000          | 1.00                                | 1.00                                 | 1.00                              | 1.00              | 1.00                                        | 1.00                        | 1.00                                 | 1.00               | 1.00                   | 1.00                 | 1.00                                            | 1.00                              |
| \$150,000 or more                         | 1.08 (0.96, 1.22)                   | 1.08 (0.97, 1.19)                    | 0.85 (0.76, 0.94)                 | 1.08 (0.97, 1.20) | 1.21 (1.02, 1.44)                           | 1.00 (0.93, 1.08)           | 0.98 (0.81, 1.18)                    | 0.93 (0.78, 1.10)  | 1.03 (0.99, 1.08)      | 1.22 (1.09, 1.37)    | 1.10 (0.96, 1.25)                               | 1.07 (0.88, 1.30)                 |
| Region                                    |                                     |                                      |                                   |                   |                                             |                             |                                      |                    |                        |                      |                                                 |                                   |
| Atlantic                                  | 1.00                                | 1.00                                 | 1.00                              | 1.00              | 1.00                                        | 1.00                        | 1.00                                 | 1.00               | 1.00                   | 1.00                 | 1.00                                            | 1.00                              |
| Quebec                                    | 1.05 (0.94, 1.18)                   | 1.50 (1.36, 1.67)                    | 0.84 (0.77, 0.93)                 | 1.02 (0.90, 1.15) | 0.51 (0.41, 0.64)                           | 0.54 (0.50, 0.60)           | 0.38 (0.30, 0.49)                    | 1.36 (1.12, 1.64)  | 0.82 (0.78, 0.86)      | 0.55 (0.47, 0.64)    | 0.88 (0.75, 1.03)                               | 2.15 (1.76, 2.64)                 |
| Ontario                                   | 1.05 (0.94, 1.17)                   | 1.09 (0.98, 1.21)                    | 0.91 (0.83, 1.00)                 | 1.21 (1.07, 1.35) | 1.26 (1.07, 1.49)                           | 1.17 (1.10, 1.26)           | 1.18 (1.00, 1.40)                    | 1.46 (1.23, 1.75)  | 1.22 (1.17, 1.27)      | 1.16 (1.04, 1.31)    | 1.34 (1.18, 1.53)                               | 1.40 (1.14, 1.73)                 |
| Prairies                                  | 0.99 (0.88, 1.11)                   | 1.17 (1.06, 1.30)                    | 0.87 (0.79, 0.95)                 | 1.41 (1.26, 1.58) | 1.20 (1.01, 1.42)                           | 0.70 (0.65, 0.76)           | 1.14 (0.96, 1.35)                    | 1.49 (1.25, 1.78)  | 1.19 (1.14, 1.24)      | 1.09 (0.97, 1.23)    | 1.28 (1.12, 1.47)                               | 1.47 (1.19, 1.82)                 |
| British Columbia                          | 1.13 (1.01, 1.26)                   | 1.10 (0.99, 1.22)                    | 0.83 (0.75, 0.91)                 | 1.36 (1.21, 1.53) | 1.40 (1.19, 1.67)                           | 1.04 (0.97, 1.12)           | 1.04 (0.87, 1.25)                    | 1.56 (1.31, 1.87)  | 1.12 (1.07, 1.16)      | 1.15 (1.02, 1.30)    | 1.27 (1.11, 1.46)                               | 1.48 (1.20, 1.84)                 |
| Marital Status                            |                                     |                                      |                                   |                   |                                             |                             |                                      |                    |                        |                      |                                                 |                                   |
| Single (never married/lived with partner) | 1.23 (1.10, 1.38)                   | 0.95 (0.84, 1.06)                    | 1.02 (0.91, 1.13)                 | 1.23 (1.10, 1.38) | 1.09 (0.90, 1.31)                           | 1.02 (0.93, 1.10)           | 1.21 (1.00, 1.46)                    | 0.94 (0.78, 1.13)  | 0.86 (0.82, 0.91)      | 0.71 (0.61, 0.83)    | 0.86 (0.73, 1.00)                               | 1.19 (0.97, 1.44)                 |
| Married or common law relationship        | 1.00                                | 1.00                                 | 1.00                              | 1.00              | 1.00                                        | 1.00                        | 1.00                                 | 1.00               | 1.00                   | 1.00                 | 1.00                                            | 1.00                              |
| Widowed                                   | 1.02 (0.90, 1.15)                   | 0.76 (0.67, 0.85)                    | 1.16 (1.06, 1.28)                 | 0.46 (0.38, 0.54) | 0.70 (0.56, 0.86)                           | 0.81 (0.74, 0.88)           | 0.84 (0.68, 1.04)                    | 0.60 (0.48, 0.74)  | 0.97 (0.93, 1.01)      | 0.48 (0.40, 0.57)    | 0.67 (0.57, 0.97)                               | 0.76 (0.60, 0.94)                 |
| Divorced and separated                    | 1.24 (1.12, 1.37)                   | 0.85 (0.77, 0.94)                    | 1.09 (0.99, 1.19)                 | 1.21 (1.09, 1.33) | 1.36 (1.17, 1.57)                           | 1.04 (0.97, 1.12)           | 1.17 (0.99, 1.39)                    | 0.98 (0.83, 1.15)  | 1.05 (1.01, 1.09)      | 0.74 (0.64, 0.84)    | 0.92 (0.80, 1.04)                               | 1.21 (1.02, 1.43)                 |
| Essential worker status                   |                                     |                                      |                                   |                   |                                             |                             |                                      |                    |                        |                      |                                                 |                                   |
| Doesn't work outside the home             | 1.00                                | 1.00                                 | 1.00                              | 1.00              | 1.00                                        | 1.00                        | 1.00                                 | 1.00               | 1.00                   | 1.00                 | 1.00                                            | 1.00                              |
| Essential worker                          | 1.03 (0.92, 1.15)                   | 1.22 (1.10, 1.33)                    | 0.95 (0.86, 1.05)                 | 2.47 (2.23, 2.73) | 1.52 (1.30, 1.76)                           | 1.07 (0.99, 1.15)           | 1.25 (1.05, 1.48)                    | 1.50 (1.29, 1.74)  | 0.98 (0.93, 1.02)      | 1.45 (1.29, 1.62)    | 1.33 (1.11, 1.50)                               | 1.64 (1.39, 1.93)                 |
| Not essential worker                      | 0.99 (0.99, 1.09)                   | 1.09 (0.99, 1.18)                    | 0.87 (0.79, 0.95)                 | 4.44 (4.12, 4.78) | 1.13 (0.97, 1.32)                           | 1.03 (0.96, 1.10)           | 1.02 (0.86, 1.20)                    | 1.36 (1.18, 1.56)  | 1.04 (1.00, 1.08)      | 1.48 (1.34, 1.63)    | 1.29 (1.15, 1.43)                               | 1.39 (1.19, 1.62)                 |
| Urban/rural status                        |                                     |                                      |                                   |                   |                                             |                             |                                      |                    |                        |                      |                                                 |                                   |
| Urban                                     | 1.00                                | 1.00                                 | 1.00                              | 1.00              | 1.00                                        | 1.00                        | 1.00                                 | 1.00               | 1.00                   | 1.00                 | 1.00                                            | 1.00                              |
| Rural                                     | 1.01 (0.93, 1.11)                   | 0.94 (0.86, 1.02)                    | 1.04 (0.97, 1.13)                 | 0.99 (0.90, 1.09) | 0.94 (0.81, 1.08)                           | 1.01 (0.95, 1.08)           | 1.01 (0.87, 1.17)                    | 0.96 (0.84, 1.10)  | 0.94 (0.90, 0.97)      | 0.99 (0.90, 1.10)    | 1.01 (0.91, 1.13)                               | 1.01 (0.86, 1.17)                 |

**Table A4.** The unadjusted association between socioeconomic characteristics and total number of stressors<sup>1</sup> among Canadian adults in the Canadian Longitudinal Study on Aging at CLSA COVID-19 Questionnaire Exit Survey (September-December 2020)

|                                                 | Unadjusted PR (95% CI) |
|-------------------------------------------------|------------------------|
| Sex                                             |                        |
| Male                                            | 1.00                   |
| Female                                          | 1.20 (1.17, 1.23)      |
| Age group                                       |                        |
| 50-64 years                                     | 1.00                   |
| 65-74 years                                     | 0.83 (0.81, 0.86)      |
| 75-96 years                                     | 0.67 (0.65, 0.69)      |
| Racial background                               |                        |
| White                                           | 1.00                   |
| Non-white                                       | 0.99 (0.92, 1.06)      |
| Education                                       |                        |
| Secondary school graduation or less             | 0.83 (0.80, 0.86)      |
| Some post-secondary education                   | 1.02 (0.97, 1.06)      |
| Post-secondary degree or diploma                | 1.00                   |
| Household income                                |                        |
| Less than \$50,000                              | 0.90 (0.87, 0.93)      |
| \$50,000 to less than \$100,000                 | 0.94 (0.91, 0.97)      |
| \$100,000 to less than \$150,000                | 1.00                   |
| \$150,000 or more                               | 1.04 (1.00, 1.08)      |
| Region                                          |                        |
| Atlantic                                        | 1.00                   |
| Quebec                                          | 0.86 (0.83, 0.90)      |
| Ontario                                         | 1.17 (1.13, 1.21)      |
| Prairies                                        | 1.08 (1.04, 1.12)      |
| British Columbia                                | 1.12 (1.08, 1.16)      |
| Marital Status                                  |                        |
| Single (never married/never lived with partner) | 0.98 (0.93, 1.02)      |
| Married or common law relationship              | 1.00                   |
| Widowed                                         | 0.83 (0.80, 0.87)      |
| Divorced and separated                          | 1.05 (1.01, 1.08)      |
| Essential worker status                         |                        |
| Doesn't work outside the home                   | 1.00                   |
| Essential worker                                | 1.18 (1.14, 1.23)      |
| Not essential worker                            | 1.23 (1.19, 1.27)      |
| Urban/rural status                              |                        |
| Urban                                           | 1.00                   |
| Rural                                           | 0.98 (0.95, 1.00)      |

1. The total number of stressors was calculated by adding the number of stressors people reported, this ranged from zero to 12.



**Table A5.** Unadjusted prevalence ratios (PRs) and 95% CI for the association between socioeconomic characteristics and negative/very negative versus neutral/positive/very positive perception of the consequences of the COVID-19 pandemic among Canadian adults in the Canadian Longitudinal Study on Aging at CLSA COVID-19 Questionnaire Exit Survey (September-December 2020)

|                                                 | Unadjusted PR (95% CI) |
|-------------------------------------------------|------------------------|
| Sex                                             |                        |
| Male                                            | 1.00                   |
| Female                                          | 0.99 (0.97, 1.01)      |
| Age group                                       |                        |
| 50-64 years                                     | 1.00                   |
| 65-74 years                                     | 0.99 (0.97, 1.01)      |
| 75-96 years                                     | 0.94 (0.92, 0.96)      |
| Racial background                               |                        |
| White                                           | 1.00                   |
| Non-white                                       | 0.94 (0.87, 1.00)      |
| Education                                       |                        |
| Secondary school graduation or less             | 0.86 (0.83, 0.89)      |
| Some post-secondary education                   | 0.98 (0.95, 1.02)      |
| Post-secondary degree or diploma                | 1.00                   |
| Household income                                |                        |
| Less than \$50,000                              | 0.89 (0.86, 0.91)      |
| \$50,000 to less than \$100,000                 | 0.96 (0.93, 0.99)      |
| \$100,000 to less than \$150,000                | 1.00                   |
| \$150,000 or more                               | 1.02 (0.99, 1.05)      |
| Region                                          |                        |
| Atlantic                                        | 1.00                   |
| Quebec                                          | 0.88 (0.84, 0.92)      |
| Ontario                                         | 1.22 (1.18, 1.26)      |
| Prairies                                        | 1.23 (1.19, 1.27)      |
| British Columbia                                | 1.19 (1.15, 1.23)      |
| Marital Status                                  |                        |
| Single (never married/never lived with partner) | 0.95 (0.91, 0.99)      |
| Married or common law relationship              | 1.00                   |
| Widowed                                         | 0.98 (0.94, 1.01)      |
| Divorced and separated                          | 0.99 (0.95, 1.02)      |
| Essential worker status                         |                        |
| Doesn't work outside the home                   | 1.00                   |
| Essential worker                                | 0.96 (0.93, 0.99)      |
| Not essential worker                            | 1.01 (0.98, 1.04)      |
| Urban/rural status                              |                        |
| Urban                                           | 1.00                   |
| Rural                                           | 0.89 (0.86, 0.92)      |

**Figure A1.** Histogram of the prevalence of total reported stressors (range: 0-12) with overlay of negative binomial distribution

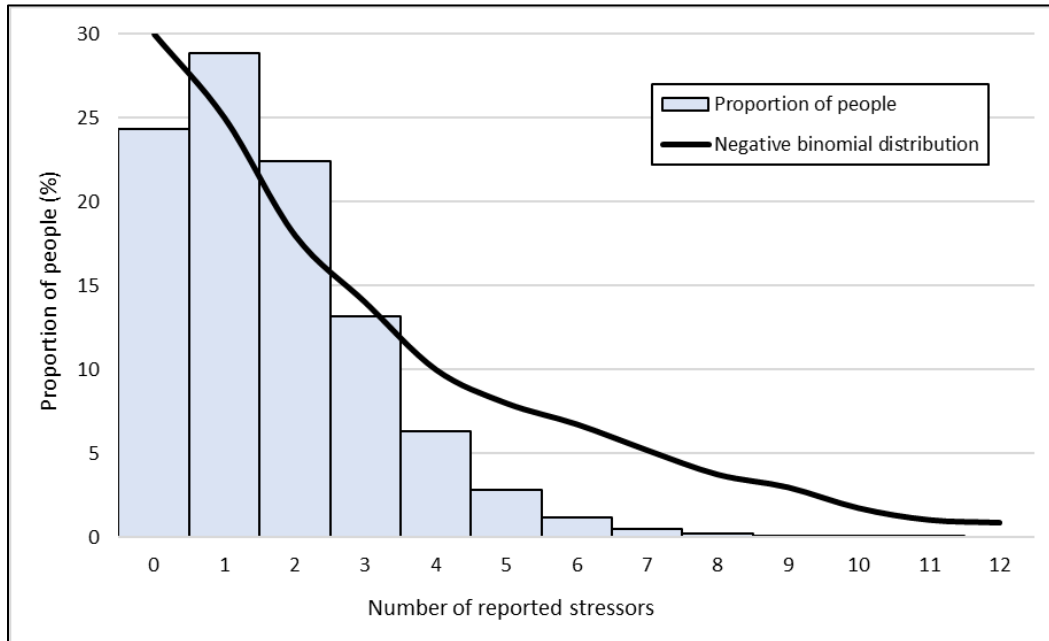

**Figure A2.** Participant flow diagram of analytic sample from the Canadian Longitudinal Study on Aging (CLSA) at CLSA COVID-19 Questionnaire Exit Survey (September-December 2020)

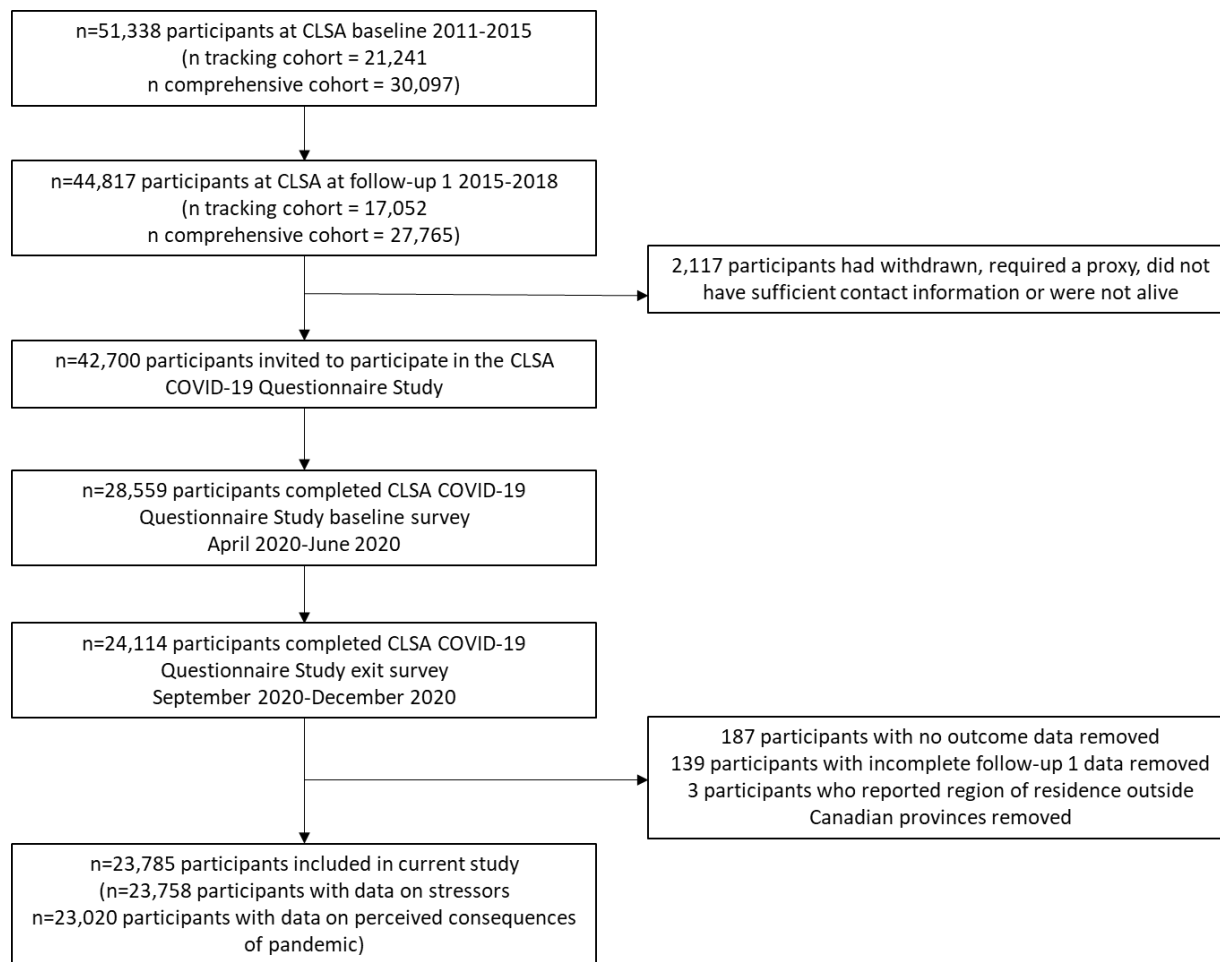

Supplement: open-2021-0313-1-at.pdf [file open-2021-0313-1-at.pdf]
